# Supplementary material for: Spatiotemporal patterns of N 2 fixation in coastal waters derived from rate measurements and remote sensing
Source: Copernicus journal article supplement (doi:10.5194/bg-18-1857-2021), 2021-03-18
Supplement: Supplementary file 1 [file bg-18-1857-2021-supplement.pdf]

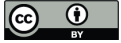

*Supplement of*

## **Spatiotemporal patterns of N<sub>2</sub> fixation in coastal waters derived from rate measurements and remote sensing**

**Mindaugas Zilius et al.**

*Correspondence to:* Mindaugas Zilius ([mindaugas.zilius@jmtc.ku.lt](mailto:mindaugas.zilius@jmtc.ku.lt)) and Paul A. Bukaveckas ([pabukaveckas@vcu.edu](mailto:pabukaveckas@vcu.edu))

The copyright of individual parts of the supplement might differ from the article licence.

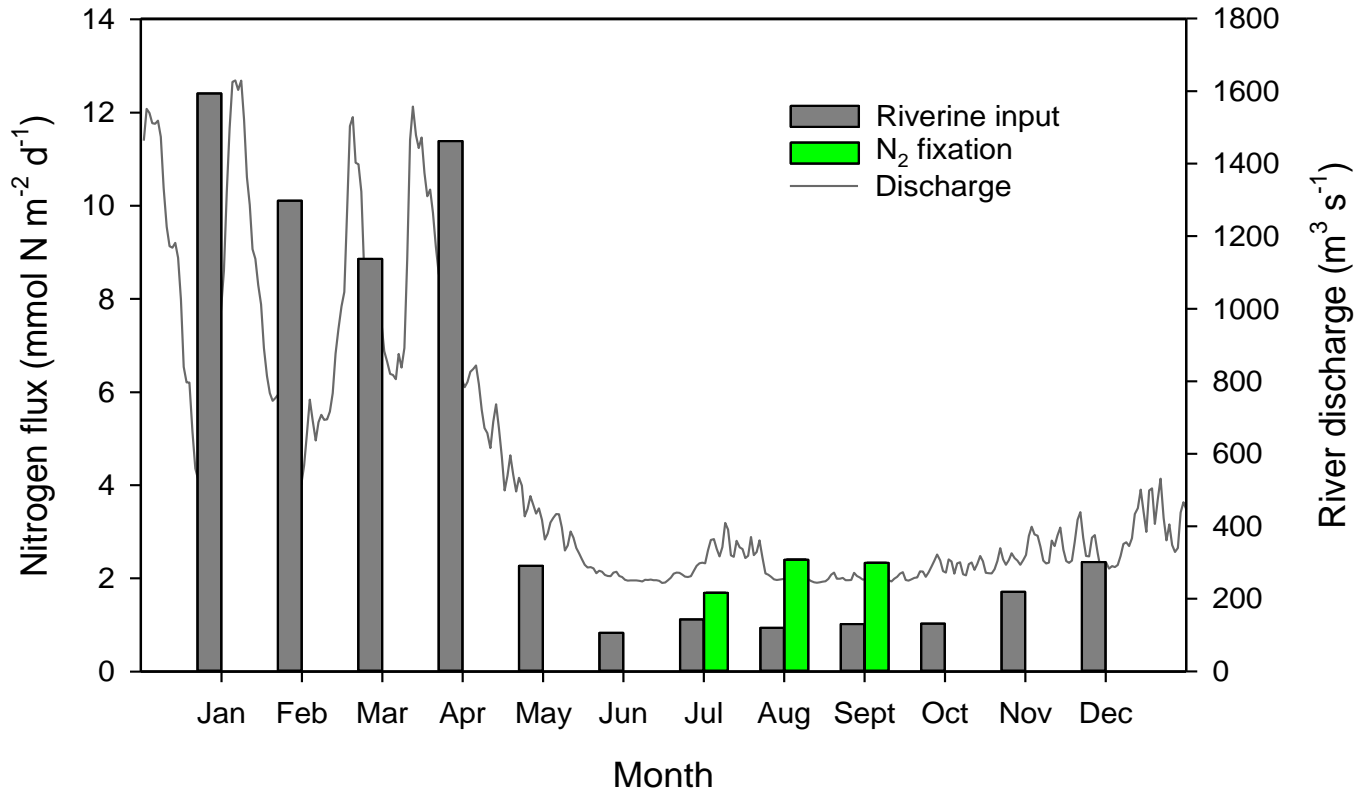

40 **Figure S1:** Nitrogen fluxes associated with riverine input to the Curonian Lagoon (total nitrogen, grey bars) and N<sub>2</sub> fixation in water column based on remote sensing of Chlorophyll-a (green bars), and daily Nemunas River discharge (grey line) in 2018. N<sub>2</sub> fixation rates are mean and standard error (some error bars not visible). The Lithuanian Hydrometeorological Service provides discharge data at the gauging section.
